# Supplementary material for: Are Children with Early Childhood Caries and Their Families Stigmatized? Perceptions and Practices of Dental Professionals: A Qualitative Study
Source: Research Square preprint supplement (doi:10.21203/rs.3.rs-7648443/v1), 2025-10-08
Supplement: Supplementary file 1 [file 1f30f5dd1632c3655a02c9dc.docx]

**Manuscript:**Are Children with Early Childhood Caries and Their Families Stigmatized? Perceptions and Practices of Dental Professionals: A Qualitative Study

**Consolidated criteria for reporting qualitative studies (COREQ): 32-item checklist**

Developed from:

Tong A, Sainsbury P, Craig J. Consolidated criteria for reporting qualitative research (COREQ): a 32-item checklist for interviews and focus groups. *International Journal for Quality in Health Care*. 2007. Volume 19, Number 6: pp. 349 – 357

| **No. Item** | **Guide questions/description** | **Reported on the text** |
| --- | --- | --- |
| **Domain 1: Research team and reﬂexivity** | | |
| *Personal Characteristics* | | |
| 1. Interviewer/facilitator | Which author/s conducted the interview or focus group? | **See the sections “Results”:** “All interviews were conducted by a social psychologist (MV)” |
| 2. Credentials | What were the researcher’s credentials? E.g. PhD, MD | Refer to the Title page |
| 3. Occupation | What was their occupation at the time of the study? | Refer to the section “Authors’ information” |
| 4. Gender | Was the researcher male or female? | Refer to the authors’ given names on the title page. |
| 5. Experience and training | What experience or training did the researcher have? | Refer to the section “Authors’ information” |
| *Relationship with participants* | | |
| 6. Relationship established | Was a relationship established prior to study commencement? | **Please refer to our article published in 20221:** « The participants will be chosen directly from the network of the research team members and from regional professional listings of each specialty (general practitioners, paediatricians, dentists). » |
| 7. Participant knowledge of the interviewer | What did the participants know about the researcher? e.g. personal goals, reasons for doing the research | Refer to the **guidebook** provided in the appendix. |
| 8. Interviewer characteristics | What characteristics were reported about the interviewer/facilitator? e.g. Bias, assumptions, reasons and interests in the research topic | **See the Discussion section, under the subsection ‘Limitations’:** “In addition, the topic was introduced in a deliberately broad and neutral manner, without judgment and with a genuine intention to understand their practices. Discrimination was not mentioned explicitly, and follow-up questions were carefully worded to avoid leading responses.” |
| **Domain 2: study design** | | |
| *Theoretical framework* | | |
| 9. Methodological orientation and Theory | What methodological orientation was stated to underpin the study? e.g. grounded theory, discourse analysis, ethnography, phenomenology, content analysis | See the Discussion section, under the subsection **‘Interpreting the Results Through the Health Stigma and discrimination Framework’** |
| *Participant selection* | | |
| 10. Sampling | How were participants selected? e.g. purposive, convenience, consecutive, snowball | **See the Results section, under the subsection ‘Participant Selection and Data Collection’:**  “Participants were recruited using a purposive sampling strategy” |
| 11. Method of approach | How were participants approached? e.g. face-to-face, telephone, mail, email | **See the Results section, under the subsection ‘Participant Selection and Data Collection’:** “Initial contact was made by email or phone, and in most cases, two follow-up messages were needed to receive a response.” |
| 12. Sample size | How many participants were in the study? | **See the Results section, under the subsection ‘Participant Selection and Data Collection’:** “Ultimately, 15 dentists were interviewed as part of this qualitative study.” |
| 13. Non-participation | How many people refused to participate or dropped out? Reasons? | **See the Results section, under the subsection ‘Participant Selection and Data Collection’:** “Sixteen dentists were contacted and invited to participate; only one declined, stating they did not feel sufficiently qualified to speak on the topic.” |
| *Setting* | | |
| 14. Setting of data collection | Where was the data collected? e.g. home, clinic, workplace | **See the Results section, under the subsection ‘Participant Selection and Data Collection’:** “Two interviews were held in person at the investigator's workplace. The remaining thirteen interviews were conducted via videoconference.” |
| 15. Presence of non-participants | Was anyone else present besides the participants and researchers? | **See the Results section, under the subsection ‘Participant Selection and Data Collection’:** “All interviews were conducted by a social psychologist (MV), and no other individuals were present during the sessions” |
| 16. Description of sample | What are the important characteristics of the sample? e.g. demographic data, date | **See Table 1** |
| *Data collection* | | |
| 17. Interview guide | Were questions, prompts, guides provided by the authors? Was it pilot tested? | Refer to the **guidebook** provided in the appendix, under the section ‘Introduction of the interviewer’ |
| 18. Repeat interviews | Were repeat interviews carried out? If yes, how many? | **Not applicable** |
| 19. Audio/visual recording | Did the research use audio or visual recording to collect the data? | **See the Results section, under the subsection ‘Participant Selection and Data Collection’:** “All interviews were systematically audio-recorded to ensure accurate verbatim transcription” |
| 20. Field notes | Were ﬁeld notes made during and/or after the interview or focus group? | **See the Results section, under the subsection ‘Participant Selection and Data Collection’:** “the interviewer also took field notes to document nonverbal cues (e.g., posture, attitudes, facial expressions, intonation).” |
| 21. Duration | What was the duration of the inter views or focus group? | **See the Results section, under the subsection ‘Participant Selection and Data Collection’:** “The interviews lasted between 35 and 75 minutes, depending on the participant, with an average duration of 50 minutes.” |
| 22. Data saturation | Was data saturation discussed? | **See the Results section, under the subsection ‘Participant Selection and Data Collection’:** “Data collection continued until data saturation was reached during thematic analysis. We applied the code meaning approach to saturation, as defined by Hennink and Kaiser in their systematic review, meaning that data collection continued until no new aspects, dimensions, or nuances emerged for each identified theme (21).” |
| 23. Transcripts returned | Were transcripts returned to participants for comment and/or correction? | **See the Results section, under the subsection ‘Participant Selection and Data Collection’:** “After transcription, each interview was sent back to the participant for review. None of the participants requested any modifications or additions.” |
| **Domain 3: analysis and ﬁndings** | | |
| *Data analysis* | | |
| 24. Number of data coders | How many data coders coded the data? | **See the Results section, under the subsection ‘Participant Selection and Data Collection’:** “Each interview was coded independently by two investigators (GL, MV) and subsequently discussed collectively to reach consensus.” |
| 25. Description of the coding tree | Did authors provide a description of the coding tree? | **See Tables 2, 3, 4 and 5** |
| 26. Derivation of themes | Were themes identiﬁed in advance or derived from the data? | **See the Results section, under the subsection ‘Participant Selection and Data Collection’:** “Similar codes were then grouped into coherent themes, defined as meaning-based patterns. Theme development drew on researchers’ subjectivity (knowledge, theoretical assumptions, etc.), as the aim was to provide an interpretation of the dataset rather than summarize it.” |
| 27. Software | What software, if applicable, was used to manage the data? | **See the section “Method”:** “data were analyzed using Atlas.ti, a qualitative data analysis software” |
| 28. Participant checking | Did participants provide feedback on the ﬁndings? | **See the Results section, under the subsection ‘Participant Selection and Data Collection’:** “After transcription, each interview was sent back to the participant for review. None of the participants requested any modifications or additions.” |
| *Reporting* | | |
| 29. Quotations presented | Were participant quotations presented to illustrate the themes/ﬁndings? Was each quotation identiﬁed? e.g. participant number | **See Tables 2, 3, 4 and 5** |
| 30. Data and ﬁndings consistent | Was there consistency between the data presented and the ﬁndings? | **See the Results section, under the subsection ‘Thematic analyses’** |
| 31. Clarity of major themes | Were major themes clearly presented in the ﬁndings? | **See the Results section, under the subsection ‘Thematic analyses’** |
| 32. Clarity of minor themes | Is there a description of diverse cases or discussion of minor themes? | **See the Results section, under the subsection ‘Thematic analyses’** |

(1)  Lienhart G, Thivichon-Prince B, Farge P, Schott-Pethelaz AM, Chaneliere M. What are health professionals’ perceptions and attitudes regarding children with early childhood caries and their families? A qualitative research protocol to assess oral health stigma in the medical setting. BMJ Open. 2022;12:e066680.
