# Supplementary material for: Are Children with Early Childhood Caries and Their Families Stigmatized? Perceptions and Practices of Dental Professionals: A Qualitative Study
Source: Research Square preprint supplement (doi:10.21203/rs.3.rs-7648443/v1), 2025-10-08
Supplement: Supplementary file 2 [file a78156d7676c9b944f456263.docx]

# Guidebook

**• Introduction of the interviewer :**

My name is MV, I am a social psychologist. Thank you for agreeing to participate in this study. In a few words, the objective of this research is to explore how healthcare professionals (general practitioners, dentists, pediatricians) perceive children with severe early childhood caries and their parents.

This conversation will be audio-recorded. I may also take notes to help with the transcription of the interviews. I’m looking for your personal opinion on children with severe caries, not general statements on the topic. There are no right or wrong answers to the questions I will ask you. At times, I may guide the conversation back to the topic in order to maintain the quality of the study. Is everything clear, or do you have any questions before we begin?

**• Self-introduction of the interviewee :**
To begin with, may I ask you to tell me your age, profession and year of graduation?

**• Main interview questions :**

| Theme 1: Perceptions of severe early childhood caries |
| --- |
| - When you think of a decayed mouth, what does that bring to mind?   - How would you describe it ?   - Would you have an example ? - What difference do you see between early childhood caries and severe early childhood caries?   - At what point would you consider that a child has a severe form? - How often do you encounter children with severe caries? |
| Theme 2: Perceptions of children with severe caries |
| - How are children whose smiles are visibly affected by caries perceived by others? - What do you think about that? How would you describe these children? |
| Theme 3: Perceptions of the families of children with severe caries |
| - How would you describe the parents of children with severe caries ? - What do you feel when meeting these children ? - What about their family ? - What difficulties do you face when managing these families ? - What kinds of ease or facilitation do you experience with these families ? |
| Theme 4: Origins and change of behavior |
| - In your view, why do these children have severe caries ? - What do you think causes these health behaviors ? - Why are these families unable to change their behavior ? - What strategies do you implement to help these families change their behavior ? - What strategies do you think could be effective to support them ? |
